# Supplementary material
Source: publisher figshare collection journal article supplement (https://sage.figshare.com/ndownloader/files/22826999)
Supplement: Supplementary file 1 [file 22826999]

# Exploring the correlation between city size and residential segregation: comparing Chilean cities with spatially unbiased indexes

## Online supplementary information

### Methodological annex: formulation of segregation indexes

This annex provides detailed mathematical formulations of the three segregation indexes that have been reported.

First, the Jargowsky<sup>(1)</sup> neighbourhood sorting index with individual data of household heads is defined as follows:

$$J = \frac{(H^{-1} \sum_n H_n (\bar{v}_n - \bar{v})^2)^{1/2}}{(H^{-1} \sum_h (v_h - \bar{v})^2)^{1/2}} \quad (1)$$

where  $H$  is the number of households, indexed by  $h$ ;  $n$  is an index of zones; and  $v$  is the number of years of formal education of household heads (income in Jargowsky<sup>(2)</sup>). This index is a ratio of variation among zones over total variation among households, adjusted for a city's socioeconomic structure in a useful way for comparative urban studies.

In each city, Jargowsky indexes were calculated for each step in a process of hierarchical spatial clustering,<sup>(3)</sup> starting from blocks. In each iteration, two areas were joined following an objective function of the minimal increase in the internal sum of squares of education years among household heads. This is akin to Ward's<sup>(4)</sup> hierarchical clustering method, but including a neighbourhood restriction that is defined by the linkages of a Delaunay triangulation among block centroids. Thus, only contiguous units can be merged, in order to produce a continuous and exhaustive partitioning of urban space. For each city, a complete set of Jargowsky indexes was calculated for every scale of aggregation, from blocks to the partition of the city into two homogeneous urban areas.

In order to control spurious aggregation effects, at each aggregation level we calculated the difference between the Jargowsky indexes obtained with real data and the average of 50 random distributions of education years among household heads, for each city. This strategy is based on the "gap statistic",<sup>(5)</sup> an estimate of the optimal number of clusters based on the comparison between actual dispersion indexes and their expectations under a random distribution. In this Monte Carlo analysis, the values of study years were shuffled among fixed residences, in order to maintain identical statistical distributions of the main variable and stable patterns of population densities. The areal dissimilarity defined by the aggregation of random data is completely spurious and measures the spatial aggregation bias. Thus, we discounted these spurious effects in the calculation of two variants

---

<sup>1</sup> Jargowsky, P A (1996), "Take the money and run: economic segregation in U.S. metropolitan areas", *American Sociological Review* Vol 61, No 6, pages 984–998.

<sup>2</sup> See reference 1.

<sup>3</sup> Openshaw, Stan and P Taylor (1979), "A million or so correlation coefficients: three experiments on the modifiable areal unit problem", in N Wrigley (editor), *Statistical Applications in the Spatial Sciences* Vol 21, Pion, London, pages 127–144.

<sup>4</sup> Ward, J H (1963), "Hierarchical grouping to optimize an objective function", *Journal of the American Statistical Association* Vol 58, No 301, pages 236–244.

<sup>5</sup> Tibshirani, R, G Walther and T Hastie (2001), "Estimating the number of clusters in a data set via the gap statistic", *Journal of the Royal Statistical Society: Series B (Statistical Methodology)* Vol 63, No 2, pages 411–423.

of Jargowsky's index. First were the Jargowsky differences between real data and shuffled data, allowing us to determine the strongest segregation scale for each city (Figure 2 in the main text). Second was the Jargowsky integral ( $JI$ ), the average of the Jargowsky differences among all aggregation levels, formulated as follows:

$$JI = n^{-1} \sum_1^n JR_n - \overline{JS_n} \quad (2)$$

where  $JR$  and  $JS$  are Jargowsky's indexes (defined in formula 1), respectively calculated with real and shuffled data at every aggregation step from 1 to  $n$ , with  $n$  being equivalent to the number of city blocks.  $JS$  values were averaged for 50 random permutations of education years among household heads.

Second, we measured evenness from an egocentric spatial perspective, calculating the Jargowsky index (formula 1) for concentric areas around each block, with 300-, 600- and 1,000-metre radiuses. This is another way to develop a multiscale segregation analysis that avoids arbitrary boundary definitions.<sup>(6)</sup>

Third, we calculated the Global Moran index<sup>(7)</sup> for each city in order to measure the spatial autocorrelation of high and low values of the average number of education years among blocks, providing a measure of the concentration of residences with higher and lower socioeconomic levels. In order to avoid underestimating segregation in small cities, we considered the 12 nearest neighbours to each block, which roughly corresponds to a 300-metre radius, although there are greater distances between large blocks in urban peripheries. The resulting spatial relationships were weighted by the number of households in each block. This index is formulated as follows:

$$I = \frac{n}{S_0} \frac{\sum_{i=1}^n \sum_{j=1}^n w_{i,j} z_i z_j}{\sum_{i=1}^n z_i^2} \quad S_0 = \sum_{i=1}^n \sum_{j=1}^n w_{i,j} \quad (3)$$

where  $z_i$  is the deviation of average years of formal education in a block from the city-level mean,  $w_{i,j}$  is the spatial weight between blocks  $i$  and  $j$ ,  $n$  is the number of blocks and  $S_0$  is the aggregate of all the spatial weights.

---

<sup>6</sup> Reardon, S F and D O'Sullivan (2004), "Measures of spatial segregation", *Sociological Methodology* Vol 34, No 1, pages 121–162.

<sup>7</sup> Anselin, L (1995), "Local indicators of spatial association—LISA", *Geographical Analysis* Vol 27, No 2, pages 93–115.

TABLE S1

Regression results for segregation indexes with city size and control variables

| <b>Dependent variable: Jargowsky difference</b> |          |                 |          |
|-------------------------------------------------|----------|-----------------|----------|
| Adj. R <sup>2</sup> : 0.755                     |          | p-value: <0.000 |          |
| Variables                                       | Estimate | Std. error      | Pr(> t ) |
| (Intercept)                                     | -0.367   | 0.064           | 0.000    |
| Log households                                  | 0.070    | 0.005           | 0.000    |
| Income inequality (Gini)                        | 0.188    | 0.092           | 0.045    |
| Median income                                   | 0.000    | 0.000           | 0.211    |
| Multidimensional poverty rate                   | -0.112   | 0.089           | 0.211    |
| New residents (%)                               | 0.283    | 0.133           | 0.036    |
| Adjacency to sea or lake (dummy)                | -0.010   | 0.012           | 0.416    |
| Topographic roughness                           | 0.000    | 0.000           | 0.188    |

  

| <b>Dependent variable: egocentric evenness 300m</b> |          |                 |          |
|-----------------------------------------------------|----------|-----------------|----------|
| Adj. R <sup>2</sup> : 0.749                         |          | p-value: <0.000 |          |
| Variables                                           | Estimate | Std. error      | Pr(> t ) |
| (Intercept)                                         | -1.372   | 0.151           | 0.000    |
| Log households                                      | 0.172    | 0.013           | 0.000    |
| Income inequality (Gini)                            | 0.233    | 0.217           | 0.286    |
| Median income                                       | 0.000    | 0.000           | 0.615    |
| Multidimensional poverty rate                       | 0.094    | 0.209           | 0.652    |
| New residents (%)                                   | 0.102    | 0.312           | 0.745    |
| Adjacency to sea or lake (dummy)                    | -0.024   | 0.029           | 0.409    |
| Topographic roughness                               | -0.001   | 0.001           | 0.112    |

  

| <b>Dependent variable: global Moran</b> |          |                 |          |
|-----------------------------------------|----------|-----------------|----------|
| Adj. R <sup>2</sup> : 0.597             |          | p-value: <0.000 |          |
| Variables                               | Estimate | Std. error      | Pr(> t ) |
| (Intercept)                             | -0.563   | 0.135           | 0.000    |
| Log households                          | 0.104    | 0.012           | 0.000    |
| Income inequality (Gini)                | 0.178    | 0.195           | 0.362    |
| Median income                           | 0.000    | 0.000           | 0.856    |
| Multidimensional poverty rate           | -0.111   | 0.187           | 0.553    |
| New residents (%)                       | 0.229    | 0.280           | 0.414    |
| Adjacency to sea or lake (dummy)        | -0.014   | 0.026           | 0.594    |
| Topographic roughness                   | -0.001   | 0.000           | 0.255    |

## NOTE:

The model for the Jargowsky integral index is not shown, as it has very similar significant variables and coefficients to the Jargowsky difference model.

## Cities by segregation, size, inequality and residential mobility

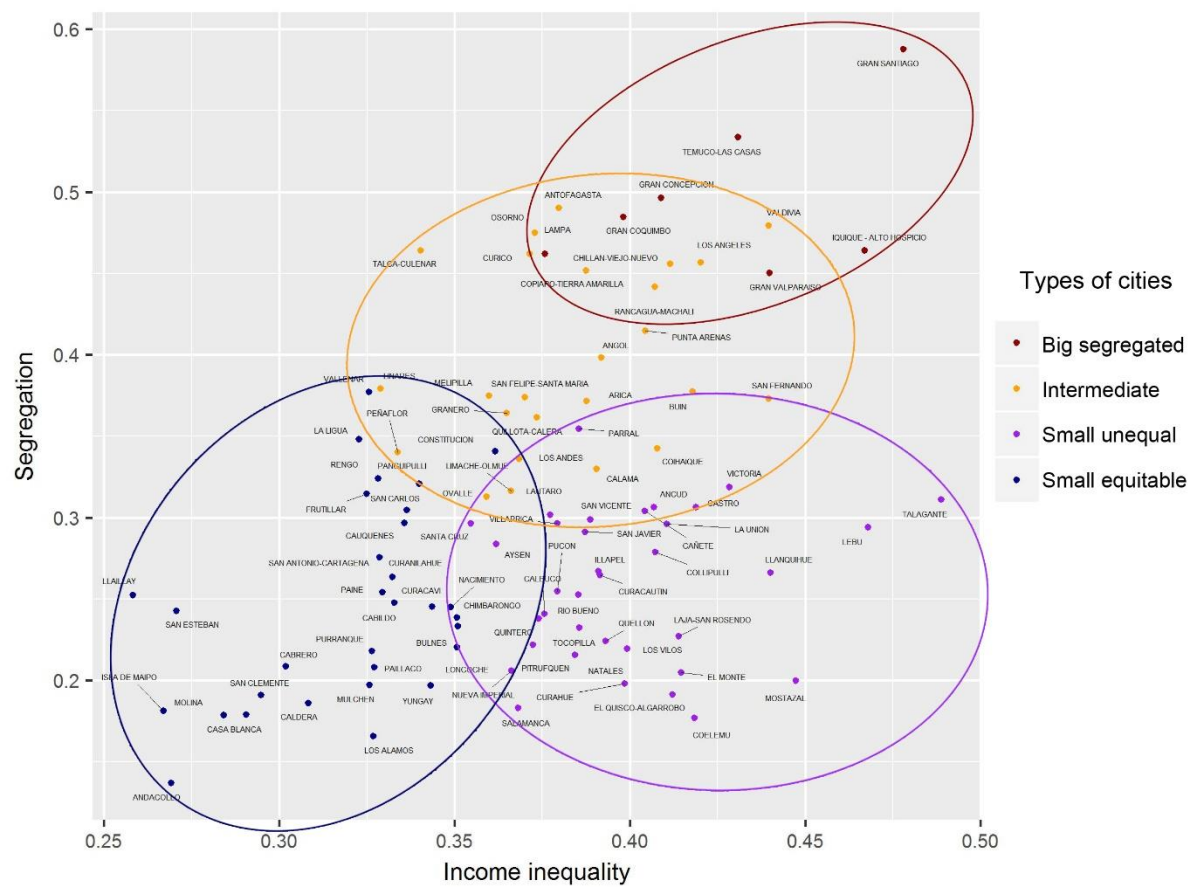

SOURCE: authors.

FIGURE S2  
Size of clusters by city size

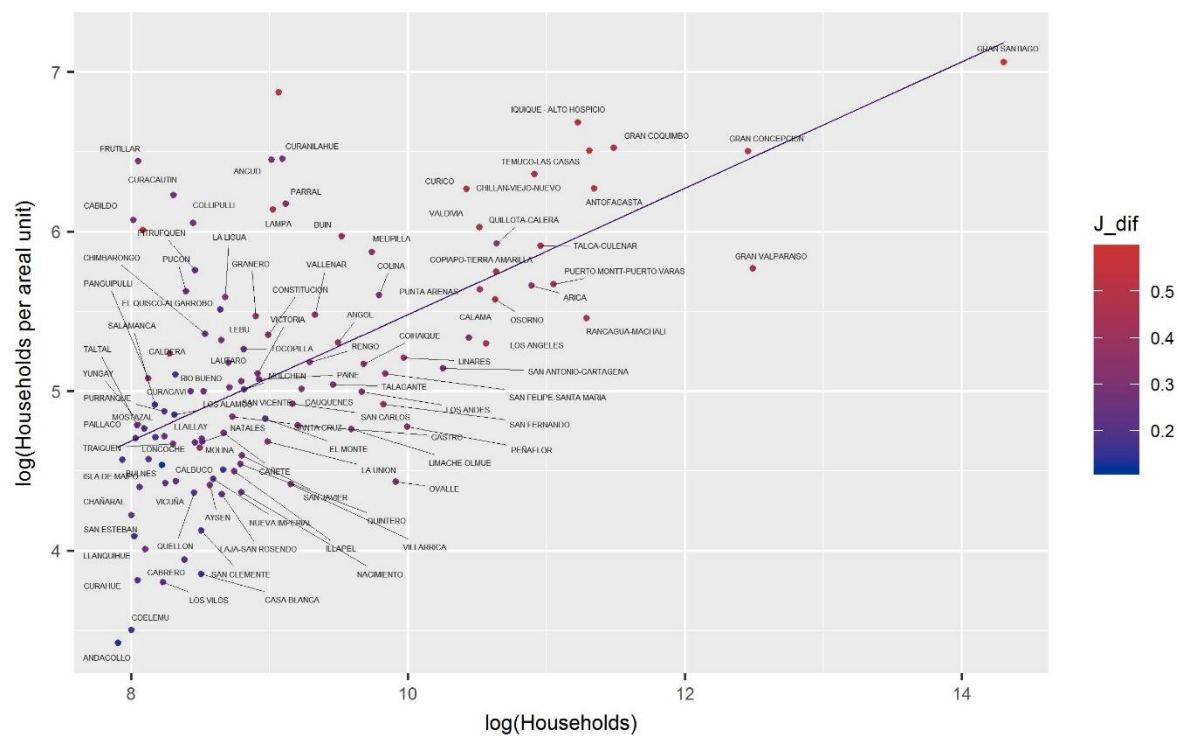

NOTE:  
 $J_{dif}$  = Jargowsky difference.

SOURCE: authors.

## END REFERENCES

Anselin, L (1995), “Local indicators of spatial association—LISA”, *Geographical Analysis* Vol 27, No 2, pages 93–115.

Jargowsky, P A (1996), “Take the money and run: economic segregation in U.S. metropolitan areas”, *American Sociological Review* Vol 61, No 6, pages 984–998

Openshaw, Stan and P Taylor (1979), “A million or so correlation coefficients: three experiments on the modifiable areal unit problem”, in N Wrigley (editor), *Statistical Applications in the Spatial Sciences* Vol 21, Pion, London, pages 127–144.

Reardon, S F and D O’Sullivan (2004), “Measures of spatial segregation”, *Sociological Methodology* Vol 34, No 1, pages 121–162.

Tibshirani, R, G Walther and T Hastie (2001), “Estimating the number of clusters in a data set via the gap statistic”, *Journal of the Royal Statistical Society: Series B (Statistical Methodology)* Vol 63, No 2, pages 411–423.

Ward, J H (1963), “Hierarchical grouping to optimize an objective function”, *Journal of the American Statistical Association* Vol 58, No 301, pages 236–244.
